# Supplementary material for: Potentially Inappropriate Prescribing and Potential Prescribing Omissions and Their Association with Adverse Drug Reaction-Related Hospital Admissions
Source: MDPI journal article supplement (doi:10.3390/jcm13020323), 2024-01-06
Supplement: s1 [file s1]

## START Version 2 Supplementary Table

**Table S1: Medications that are potentially omitted in older populations (N=798)**

| Criteria                                                                                                                                                                                                           | N (%)<br>Disorder | N (%)<br>PPO | 95% CI  | ADR OR<br>(95% CI)       | Omission/Limitations                                                          |
|--------------------------------------------------------------------------------------------------------------------------------------------------------------------------------------------------------------------|-------------------|--------------|---------|--------------------------|-------------------------------------------------------------------------------|
| Bisphosphonates and vitamin D and calcium in patients taking long-term systemic corticosteroid therapy.                                                                                                            | 62 (7.8)          | 56 (90)      | 80- 96  | 0.94 (0.14-6.11)         | Unknown duration of corticosteroid therapy                                    |
| Non-TCA antidepressant drug in the presence of persistent major depressive symptoms.                                                                                                                               | 77 (9.6)          | 56 (72.7)    | 62 –82  | 1.82 (0.59-5.69)         | Unknown duration of symptoms. Applied to those with a diagnosis of depression |
| Angiotensin Converting Enzyme (ACE) inhibitor with systolic heart failure and/or documented coronary artery disease.                                                                                               | 618 (77.4)        | 422 (68.3)   | 65 -72  | 0.69 (0.49-0.98; p=0.04) | -                                                                             |
| Acetylcholinesterase inhibitor (e.g. donepezil, rivastigmine, galantamine) for mild-moderate Alzheimer's dementia or Lewy Body dementia (rivastigmine).                                                            | 109 (13.7)        | 73 (67)      | 58 -75  | 0.51 (0.22-1.18)         | Could not establish severity of Alzheimer's dementia or Lewy body dementia    |
| Disease-modifying anti-rheumatic drug (DMARD) with active, disabling rheumatoid disease.                                                                                                                           | 28 (3.5)          | 18 (64.3)    | 44- 80  | 2.37 (0.36-15.49)        | Could not establish whether or not rheumatoid disease was disabling           |
| Bone anti-resorptive or anabolic therapy (e.g. bisphosphonate, strontium ranelate, teriparatide, denosumab) in patients with documented osteoporosis, where no pharmacological or clinical status contraindication | 92 (11.5)         | 52 (56.5)    | 46 - 66 | 3.25 (1.20-8.78; p=0.02) | Could not establish bone density scores                                       |

| Criteria                                                                                                                                                                                                                                                | N (%)<br>Disorder | N (%)<br>PPO | 95% CI | ADR OR<br>(95% CI) | Omission/Limitations                                        |
|---------------------------------------------------------------------------------------------------------------------------------------------------------------------------------------------------------------------------------------------------------|-------------------|--------------|--------|--------------------|-------------------------------------------------------------|
| exists (Bone Mineral Density T-scores $> 2.5$ in multiple sites) and/or previous history of fragility fracture(s).                                                                                                                                      |                   |              |        |                    |                                                             |
| Statin therapy with a documented history of coronary, cerebral or peripheral vascular disease, unless the patient's status is end-of-life or age is $> 85$ years.                                                                                       | 637 (79.8)        | 312 (49)     | 45 -53 | 0.32 (0.90-1.95)   | -                                                           |
| Laxatives in patients receiving opioids regularly.                                                                                                                                                                                                      | 87 (10.9)         | 43 (49.4)    | 39 -60 | 0.98 (0.39-2.51)   | -                                                           |
| Regular inhaled corticosteroid for moderate-severe asthma or COPD, where FEV1 $< 50\%$ of predicted value and repeated exacerbations requiring treatment with oral corticosteroids.                                                                     | 224 (28.1)        | 107 (47.8)   | 41-54  | 0.89 (0.50-1.58)   | Could not establish if FEV1 $< 50\%$ of predicted value     |
| ACE inhibitor or Angiotensin Receptor Blocker (if intolerant of ACE inhibitor) in diabetes with evidence of renal disease i.e. dipstick proteinuria or microalbuminuria ( $> 30\text{mg}/24$ hours) with or without serum biochemical renal impairment. | 60 (7.5)          | 29 (48.3)    | 36-61  | 0.80 (0.24-2.61)   | -                                                           |
| Vitamin D and calcium supplement in patients with known osteoporosis and/or previous fragility fracture(s) and/or (Bone Mineral Density T-scores more than $-2.5$ in multiple sites).                                                                   | 92 (11.5)         | 38 (41.3)    | 32 -52 | 0.69 (0.29-1.64)   | Cannot establish fragility fractures or bone density scores |

| Criteria                                                                                                                                                                | N (%)<br>Disorder | N (%)<br>PPO | 95% CI  | ADR OR<br>(95% CI)       | Omission/Limitations                                                   |
|-------------------------------------------------------------------------------------------------------------------------------------------------------------------------|-------------------|--------------|---------|--------------------------|------------------------------------------------------------------------|
| Beta-blocker with ischaemic heart disease.                                                                                                                              | 353 (44.2)        | 140 (39.7)   | 34 -45  | 0.76 (0.49-1.18)         | -                                                                      |
| Antiplatelet therapy (aspirin or clopidogrel or prasugrel or ticagrelor) with a documented history of coronary, cerebral or peripheral vascular disease.                | 637 (79.8)        | 242 (38)     | 34 - 42 | 0.65 (0.47-0.92; p=0.01) | -                                                                      |
| Appropriate beta-blocker (bisoprolol, nebivolol, metoprolol or carvedilol) with stable systolic heart failure.                                                          | 159 (19.9)        | 52 (32.7)    | 26- 40  | 0.79 (0.39-1.62)         | -                                                                      |
| Xanthine-oxidase inhibitors (e.g. allopurinol, febuxostat) with a history of recurrent episodes of gout.                                                                | 41 (5.1)          | 13 (31.7)    | 19 -48  | 1.29 (0.26-6.30)         | -                                                                      |
| Selective serotonin reuptake inhibitor (or SNRI or pregabalin if SSRI contraindicated) for persistent severe anxiety that interferes with independent functioning.      | 23 (2.9)          | 7 (30.4)     | 15 -53  | 10.01 (0.23-430.62)      | Could not establish if anxiety interferes with independent functioning |
| Vitamin D supplement in older people who are housebound or experiencing falls or with osteopenia (Bone Mineral Density T-score is > -1.0 but < -2.5 in multiple sites). | 145 (18.2)        | 44 (30.3)    | 23 -38  | 0.98 (0.44-2.17)         | Could not establish bone density scores                                |
| Topical prostaglandin, prostamide or beta-blocker for primary open-angle glaucoma                                                                                       | 22 (2.8)          | 6 (27.3)     | 12 -50  | 23.21 (0.37-1427.18)     | Could not establish if open-angle glaucoma, just presence of glaucoma  |
| Vitamin K antagonists or direct thrombin inhibitors or factor Xa inhibitors in                                                                                          | 46 (5.8)          | 9 (19.6)     | 10 - 34 | 0.20 (0.03-1.42)         | -                                                                      |

| Criteria                                                                                                      | N (%)<br>Disorder | N (%)<br>PPO | 95% CI | ADR OR<br>(95% CI) | Omission/Limitations         |
|---------------------------------------------------------------------------------------------------------------|-------------------|--------------|--------|--------------------|------------------------------|
| the presence of chronic atrial fibrillation.                                                                  |                   |              |        |                    |                              |
| Proton Pump Inhibitor with severe gastro-oesophageal reflux disease or peptic stricture requiring dilatation. | 30 (3.8)          | 6 (20)       | 9- 39  | 1.77 (0.19-16.69)  | Could not establish severity |

\* Using Bonferroni corrections for 20 criteria applied  $p < 0.003$ ; no criteria were significantly associated with ADR-related hospital admissions

## Beers 2019 Supplementary Tables S2-S7

**Table S2: Medications that are potentially inappropriate in older populations (N=798)**

| Medication/Medication Class           | N (%)     | 95% CI    | Limitations                                                                                                  |
|---------------------------------------|-----------|-----------|--------------------------------------------------------------------------------------------------------------|
| Zolpidem                              | 62 (7.77) | 6.10-9.84 |                                                                                                              |
| Antipsychotics (1st & 2nd generation) | 57 (7.02) | 5.34-9.02 | Could not establish if used as an antiemetic during chemotherapy                                             |
| Amitriptyline                         | 33 (4.13) | 2.86-5.76 |                                                                                                              |
| Diazepam                              | 30 (3.76) | 2.55-5.32 |                                                                                                              |
| Digoxin                               | 28 (3.51) | 2.34-5.03 | Included if A.FIB or heart failure were present                                                              |
| Doxazosin                             | 21 (2.63) | 1.64-3.99 | Included if medication and hypertension present                                                              |
| Belladonna alkaloids                  | 17 (2.13) | 1.25-3.39 |                                                                                                              |
| Ibuprofen                             | 15 (1.88) | 1.06-3.08 |                                                                                                              |
| Metoclopramide                        | 11 (1.38) | 0.69-2.45 |                                                                                                              |
| Flurazepam                            | 11 (1.38) | 0.69-2.45 |                                                                                                              |
| Temazepam                             | 10 (1.25) | 0.60-2.29 |                                                                                                              |
| Triazolam                             | 9 (1.13)  | 0.50-2.13 |                                                                                                              |
| Amiodarone                            | 9 (1.13)  | 0.50-2.13 | Counted if A.FIB or Heart Failure were present. Could not establish substantial left ventricular hypertrophy |
| Naproxen                              | 8 (1.00)  | 0.43-1.97 |                                                                                                              |
| Lorazepam                             | 8 (1.00)  | 0.43-1.97 |                                                                                                              |
| Promethazine                          | 6 (0.75)  | 0.28-1.63 |                                                                                                              |
| Nitrofurantoin                        | 6 (0.75)  | 0.28-1.63 |                                                                                                              |

| Medication/Medication Class | N (%)    | 95% CI    | Limitations                |
|-----------------------------|----------|-----------|----------------------------|
| Ketoprofen                  | 6 (0.75) | 0.28-1.63 |                            |
| Atropine                    | 6 (0.75) | 0.28-1.63 |                            |
| Diclofenac                  | 5 (0.63) | 0.20-1.46 | Chronic use not determined |
| Clonazepam                  | 5 (0.63) | 0.20-1.46 |                            |

Potentially identifiable data where n<5 are not presented.

Excluded criteria: Oestrogen, Reserpine

**Table S1: Potentially inappropriate medication use in older adults due to drug-disease or drug-syndrome interactions that may exacerbate the disease or syndrome**

| Medication/Medication Class                                                           | N (proportion) | 95% CI      | Limitations/<br>Notes |
|---------------------------------------------------------------------------------------|----------------|-------------|-----------------------|
| <b><i>Syncope (N=67)</i></b>                                                          |                |             |                       |
| Participants with syncope prescribed at least one PIPs                                | 9 (0.13)       | 0.07 – 0.24 |                       |
| <b><i>Delirium (N=205)</i></b>                                                        |                |             |                       |
| Anticholinergics                                                                      | 56 (0.27)      | 0.22 – 0.34 |                       |
| Antipsychotics/Benzodiazepines                                                        | 33 (0.16)      | 0.12 – 0.22 |                       |
| Corticosteroids                                                                       | 85 (0.42)      | 0.35 – 0.48 |                       |
| Zolpidem                                                                              | 15 (0.07)      | 0.04 – 0.12 |                       |
| Participants with delirium prescribed at least one of above PIPs                      | 124 (0.61)     | 0.54 – 0.67 |                       |
| <b><i>Dementia or Cognitive Impairment (N=258)</i></b>                                |                |             |                       |
| Anticholinergics                                                                      | 72 (0.28)      | 0.23 – 0.34 |                       |
| Antipsychotics/Benzodiazepines                                                        | 61 (0.24)      | 0.19 – 0.29 |                       |
| Zolpidem                                                                              | 17 (0.07)      | 0.04- 0.10  |                       |
| Participants with dementia/Cognitive impairment prescribed at least one of above PIPs | 107 (0.41)     | 0.36 – 0.48 |                       |
| <b><i>History of falls/fracture (N=67)</i></b>                                        |                |             |                       |
| Antiepileptics                                                                        | 186 (0.24)     | 0.15 – 0.38 |                       |
| Antipsychotics                                                                        | 8 (0.12)       | 0.06 – 0.22 |                       |
| Benzodiazepines                                                                       | 5 (0.07)       | 0.03 – 0.17 |                       |

| Medication/Medication Class                                                          | N (proportion) | 95% CI      | Limitations/<br>Notes |
|--------------------------------------------------------------------------------------|----------------|-------------|-----------------------|
| Zolpidem                                                                             | 7 (0.10)       | 0.05 – 0.21 |                       |
| Antidepressants                                                                      | 23 (0.34)      | 0.24 – 0.46 |                       |
| SNRIs                                                                                | 5 (0.07)       | 0.03 – 0.17 |                       |
| Opioids                                                                              | 9 (0.10)       | 0.05 – 0.21 |                       |
| Participants with history of falls/fracture<br>prescribed at least one of above PIPs | 47 (0.70)      | 0.58 – 0.80 |                       |

Potentially identifiable data where n<5 are not presented

N (proportion) of patients per condition or disease group

**Table S4: Medications to be used with caution in older adults (N=798)**

| Medication/Medication Class | N (%)       | 95% CI       | Limitations/Notes |
|-----------------------------|-------------|--------------|-------------------|
| Diuretics                   | 450 (56.39) | 52.87-59.87  |                   |
| Aspirin                     | 420 (52.63) | 49.10-56.14  |                   |
| SSRI                        | 115 (14.41) | 12.05-17.04  |                   |
| SNRI                        | 76 (9.52)   | 7.58 – 11.78 |                   |
| Antipsychotics              | 71 (8.89)   | 7.01-11.09   |                   |
| Mirtazapine                 | 39 (4.89)   | 3.50-6.62    |                   |
| TCA                         | 39 (4.89)   | 3.50-6.62    |                   |
| Rivaroxaban                 | 38 (4.76)   | 3.39-6.48    |                   |
| Tramadol                    | 38 (4.76)   | 3.39-6.48    |                   |
| Dabigatran                  | 9 (1.13)    | 0.52-2.13    |                   |
| Prasugrel                   | 5 (0.62)    | 0.20-1.46    |                   |

Potentially identifiable data where n<5 are not presented

**Table S5: Drug-drug interactions that should be avoided in older adults (N=798)**

| Medication/Medication Class                                                                                         | N (%)       | 95% CI        | Limitations/Notes |
|---------------------------------------------------------------------------------------------------------------------|-------------|---------------|-------------------|
| Three or more: Antidepressants, Antipsychotics,<br>Antiepileptics, Opioids, Benzodiazepines and<br>Hypnotic Z-drugs | 114 (14.29) | 11.93 – 16.91 |                   |
| Peripheral $\alpha$ -1 blockers + Loop diuretics                                                                    | 41 (5.14)   | 3.71 – 6.91   |                   |

|                                                                      |           |             |  |
|----------------------------------------------------------------------|-----------|-------------|--|
| Opioids + Gabapentin/Pregabalin                                      | 21 (2.63) | 1.64 – 3.99 |  |
| Warfarin + Amiodarone                                                | 14 (1.75) | 0.96 - 2.93 |  |
| RAS inhibitor/potassium-sparing diuretics +<br>Another RAS inhibitor | 13 (1.63) | 0.87 – 2.77 |  |
| Opioids + Benzodiazepines                                            | 10 (1.25) | 0.60 – 2.29 |  |
| Anticholinergic + Anticholinergic                                    | 9 (1.13)  | 0.52 – 2.13 |  |

Potentially identifiable data where n<5 are not presented

**Table S6: Medications that should be avoided or have their dosage reduced with varying levels of kidney function in older adults**

| Medication/Medication Class | Creatinine Clearance mL/min (N) | N (%)      | 95% CI      | Limitations/Notes |
|-----------------------------|---------------------------------|------------|-------------|-------------------|
| Pregabalin                  | < 60 (403)                      | 42 (10.42) | 0.08 – 0.14 |                   |
| Rivaroxaban                 | < 50 (328)                      | 25 (7.62)  | 0.05 – 0.11 |                   |
| Levetiracetam               | ≤ 80 (514)                      | 16 (3.11)  | 0.02 – 0.05 |                   |
| Ranitidine                  | < 50 (328)                      | 12 (3.66)  | 0.02 – 0.06 |                   |
| Spironolactone              | < 30 (123)                      | 8 (6.50)   | 0.03 – 0.13 |                   |
| Gabapentin                  | < 60 (403)                      | 7 (1.73)   | 0.01 – 0.04 |                   |
| Tramadol                    | < 30 (123)                      | 7 (5.69)   | 0.03 – 0.12 |                   |
| Apixaban                    | < 25 (82)                       | 6 (7.32)   | 0.03 – 0.16 |                   |

Potentially identifiable data where n<5 are not presented

Creatinine clearance (CrCl) calculated using the Cockcroft-Gault equation

N (%) of patients with the specified creatinine clearance and the medication

**Table S7: Medications with strong anticholinergic properties (N=798)**

| Medication/Medication Class   | N (%)    | 95% CI   | Limitations/Notes |
|-------------------------------|----------|----------|-------------------|
| Amitriptyline                 | 33 (4.1) | 2.9-5.8  |                   |
| Solifenacin                   | 21 (2.6) | 1.6-4.0  |                   |
| Prochlorperazine              | 18 (2.3) | 1.3- 3.5 |                   |
| Tolterodine                   | 15 (1.9) | 1.1-3.1  |                   |
| Promethazine (antihistamines) | 6 (0.8)  | 0.2-1.6  |                   |
| Fesoterodine                  | 6 (0.8)  | 0.2-1.6  |                   |
| Olanzapine                    | 6 (0.8)  | 0.2-1.6  |                   |
| Atropine                      | 6 (0.8)  | 0.2-1.6  |                   |

Potentially identifiable data where n<5 are not presented



**Table S8: The association between Beers 2019 criteria Tables S2-S7 and ADR-related hospital admissions**

| Beers 2019 criteria | Unadjusted odds ratio (95% CI) |
|---------------------|--------------------------------|
| Table S2            | 0.88 (0.66, 1.18)              |
| Table S3            | 0.98 (0.71, 1.36)              |
| Table S4            | 1.94 (1.30, 2.90; p=0.001)*    |
| Table S5            | 1.16 (0.83, 1.62)              |
| Table S6            | 1.30 (0.87, 1.94)              |
| Table S7            | 0.66 (0.44, 0.98)              |

\* p<0.05

## STOPP Version 2 Supplementary Table

**Table S1: Medications that are potentially inappropriate in older populations (N=798)**

| Criteria                                                                                                                                                                                                                                                                     | N (%)                                                                               | 95% CI | ADR OR (95% CI)                       | Omission/Limitations                                                  |
|------------------------------------------------------------------------------------------------------------------------------------------------------------------------------------------------------------------------------------------------------------------------------|-------------------------------------------------------------------------------------|--------|---------------------------------------|-----------------------------------------------------------------------|
| Loop diuretic as first-line treatment for hypertension (lack of outcome data for this indication; safer, more effective alternatives available).                                                                                                                             | 159 (20)<br>Hypertension (N=558; 28.5)                                              | 17-23  | 1.66 (1.15-2.39)                      | Unable to establish first line treatment                              |
| Hypnotic Z-drugs e.g. zopiclone, zolpidem, zaleplon (may cause protracted daytime sedation, ataxia).                                                                                                                                                                         | 156 (19.6)                                                                          | 17-22  | 0.96 (0.66-1.37)                      | -                                                                     |
| Benzodiazepines (sedative, may cause reduced sensorium, impair balance).                                                                                                                                                                                                     | 86 (10.8)                                                                           | 9-13   | 0.74 (0.46 – 1.19)                    | -                                                                     |
| Antiplatelet agents with vitamin K antagonist, direct thrombin inhibitor or factor Xa inhibitors in patients with stable coronary, cerebrovascular or peripheral arterial disease without a clear indication for anticoagulant therapy (no added benefit from dual therapy). | 84 (10.5)<br>Coronary, cerebrovascular or peripheral arterial disease (N=481; 17.5) | 9-13   | <b>2.96 (1.81-4.85; p&lt;0.001)**</b> | Cannot establish without a clear indication for anticoagulant therapy |

| Criteria                                                                                                                                                                                                                                                             | N (%)                                                                                             | 95% CI   | ADR OR (95% CI)            | Omission/Limitations                                                      |
|----------------------------------------------------------------------------------------------------------------------------------------------------------------------------------------------------------------------------------------------------------------------|---------------------------------------------------------------------------------------------------|----------|----------------------------|---------------------------------------------------------------------------|
| Antimuscarinic drugs with dementia, or chronic cognitive impairment (risk of increased confusion, agitation) or narrow-angle glaucoma (risk of acute exacerbation of glaucoma), or chronic prostatism (risk of urinary retention).                                   | 80 (10)<br><br>Dementia (N=124; 64.5)<br><br>Glaucoma (N=22; 27.5)<br><br>Prostatism (N=65; 81.3) | 8-12     | 1.14 (0.71 – 1.84)         | Cannot establish narrow-angle glaucoma                                    |
| Concomitant use of two or more drugs with antimuscarinic/anticholinergic properties (e.g. bladder antispasmodics, intestinal antispasmodics, tricyclic antidepressants, first generation antihistamines) (risk of increased antimuscarinic/anticholinergic toxicity) | 74 (9.3)                                                                                          | 7-11     | 0.55 (0.33 – 0.91; p=0.02) | -                                                                         |
| Neuroleptic drugs (may cause gait dyspraxia, Parkinsonism).                                                                                                                                                                                                          | 71 (8.9)                                                                                          | 7-11     | 0.83 (0.50 – 1.37)         | -                                                                         |
| Anticholinergics/antimuscarinics in patients with delirium or dementia (N=251) (risk of exacerbation of cognitive impairment).                                                                                                                                       | 67 (8.4)<br><br>Delirium/ dementia (N=251; 26.7)                                                  |          | 1.06 (0.63- 1.80)          | -                                                                         |
| Anticholinergics/antimuscarinics to treat extra-pyramidal side-effects of neuroleptic medications (risk of anticholinergic toxicity)                                                                                                                                 | 60 (7.5)                                                                                          | 5.9 -9.6 | 1.09 (0.64- 1.88)          | Can only account for the two medications types being taken simultaneously |
| Non-selective beta-blocker (whether oral or topical for glaucoma) with a history of asthma requiring treatment (risk of increased bronchospasm).                                                                                                                     | 59 (7.4)                                                                                          | 6-9      | 0.77 (0.45- 1.34)          | Cannot establish asthma requiring treatment                               |

| Criteria                                                                                                                                                                                                                                                 | N (%)                                                                              | 95% CI   | ADR OR (95% CI)    | Omission/Limitations                                                           |
|----------------------------------------------------------------------------------------------------------------------------------------------------------------------------------------------------------------------------------------------------------|------------------------------------------------------------------------------------|----------|--------------------|--------------------------------------------------------------------------------|
| NSAID with severe hypertension (risk of exacerbation of hypertension) or severe heart failure (risk of exacerbation of heart failure).                                                                                                                   | 35 (4.4)<br><br>Hypertension (N=558; 6.2)                                          |          | 0.50 (0.24-1.04)   | -                                                                              |
| Use of regular (as distinct from PRN) opioids without concomitant laxative (risk of severe constipation).                                                                                                                                                | 38 (4.8)                                                                           | 3-6      | 1.02 (0.53 – 1.97) | -                                                                              |
| Any duplicate drug class prescription e.g. two concurrent NSAIDs, SSRIs, loop diuretics, ACE inhibitors, anticoagulants (optimisation of monotherapy within a single drug class should be observed prior to considering a new agent).                    | 31 (3.9)                                                                           | 3-5      | 2.30 (1.08-5.13)   |                                                                                |
| Neuroleptic antipsychotic in patients with behavioural and psychological symptoms of dementia (BPSD) unless symptoms are severe and other treatments have failed (increased risk of stroke).                                                             | 31 (3.9)<br><br>Dementia (N=124; 25)                                               |          | 0.73 (0.35-1.56)   | Cannot establish “unless symptoms are severe and other treatments have failed” |
| Phosphodiesterase type-5 inhibitors (e.g. sildenafil, tadalafil, vardenafil) in severe heart failure characterised by hypotension i.e. systolic BP < 90 mmHg, or concurrent daily nitrate therapy for angina (risk of cardiovascular collapse)           | 30 (3.8)<br><br>Severe Heart failure (N=145; 20.7)<br><br>Hypotension (N=58; 51.7) | 2.6- 5.3 | 0.88 (0.42-1.87)   | Examined concurrent severe heart failure and hypotension                       |
| Phenothiazines as first-line treatment, since safer and more efficacious alternatives exist (phenothiazines are sedative, have significant anti-muscarinic toxicity in older people, with the exception of prochlorperazine for nausea/vomiting/vertigo, | 21 (2.6)                                                                           | 1.7-4    | 0.91 (0.37-2.20)   | Unable to establish first line treatment                                       |

| Criteria                                                                                                                                                                                                                                                                                                                | N (%)                                                                          | 95% CI  | ADR OR<br>(95% CI)          | Omission/Limitations                                                  |
|-------------------------------------------------------------------------------------------------------------------------------------------------------------------------------------------------------------------------------------------------------------------------------------------------------------------------|--------------------------------------------------------------------------------|---------|-----------------------------|-----------------------------------------------------------------------|
| chlorpromazine for relief of persistent hiccoughs and levomepromazine as an anti-emetic in palliative care).                                                                                                                                                                                                            |                                                                                |         |                             |                                                                       |
| Acetylcholinesterase inhibitors with a known history of persistent bradycardia (< 60 beats/min.), heart block or recurrent unexplained syncope or concurrent treatment with drugs that reduce heart rate such as beta-blockers, digoxin, diltiazem, verapamil (risk of cardiac conduction failure, syncope and injury). | 19 (2)                                                                         | 1.5 - 4 | 1.53 (0.61-3.86)            | Cannot establish persistent bradycardia                               |
| Selective alpha-1 selective alpha blockers in those with symptomatic orthostatic hypotension or micturition syncope (risk of precipitating recurrent syncope)                                                                                                                                                           | 19 (2.4)<br><br>Orthostatic hypotension (N=24;79.2)<br><br>Syncope (N=67;28.4) | 1.5-4   | 2.10 (0.80-5.49)            | -                                                                     |
| Vitamin K antagonist, direct thrombin inhibitor or factor Xa inhibitors for first pulmonary embolus (N=33) without continuing provoking risk factors for > 12 months (no proven added benefit).                                                                                                                         | 15 (1.9)<br><br>Pulmonary embolus (N=33; 45.5)                                 |         | 4.65 (1.29 – 16.73; 0.019)* | Cannot establish “without continuing provoking risk factors for > 12” |
| Aspirin with a past history of peptic ulcer disease without concomitant PPI (risk of recurrent peptic ulcer).                                                                                                                                                                                                           | 14 (1.8)                                                                       | 1-3     | 3.86 (1.19-12.53)           | -                                                                     |
| Oral bisphosphonates in patients with a current or recent history of upper gastrointestinal disease i.e. dysphagia, oesophagitis, gastritis, duodenitis, or peptic ulcer disease, or upper gastrointestinal bleeding                                                                                                    | 14 (1.8)<br><br>Gastrointestinal disease (N=174; 8)                            |         | 1.52 (0.51-4.48)            | -                                                                     |

| Criteria                                                                                                                                                                                                                                | N (%)                                                  | 95% CI  | ADR OR<br>(95% CI) | Omission/Limitations                                                 |
|-----------------------------------------------------------------------------------------------------------------------------------------------------------------------------------------------------------------------------------------|--------------------------------------------------------|---------|--------------------|----------------------------------------------------------------------|
| (risk of relapse/exacerbation of oesophagitis, oesophageal ulcer, oesophageal stricture)                                                                                                                                                |                                                        |         |                    |                                                                      |
| Aspirin in combination with vitamin K antagonist, direct thrombin inhibitor or factor Xa inhibitors in patients with chronic atrial fibrillation (AF) without a clear indication for aspirin (no added benefit from aspirin)            | 13 (1.6)<br><br>Chronic AF<br>(N=46; 28.6)             |         | 2.85 (0.86-9.42)   | Cannot establish without a clear indication for aspirin              |
| Corticosteroids (other than periodic intra-articular injections for mono-articular pain) for osteoarthritis (risk of systemic corticosteroid side-effects).                                                                             | 12 (1.5)<br><br>Osteoarthritis<br>(N=122; 9.8)         |         | 3.50 (0.93-13.18)  | -                                                                    |
| Systemic corticosteroids instead of inhaled corticosteroids for maintenance therapy in moderate-severe COPD (unnecessary exposure to long-term side-effects of systemic corticosteroids and effective inhaled therapies are available). | 12 (1.5)<br><br>COPD (N=173; 6.9)                      |         | 0.58 (0.17-1.98)   | -                                                                    |
| First-generation antihistamines (safer, less toxic antihistamines now widely available).                                                                                                                                                | 11 (1.4)                                               | 0.8-2.5 | 0.92 (0.27-3.07)   | -                                                                    |
| COX-2 selective NSAIDs with concurrent cardiovascular disease (increased risk of myocardial infarction and stroke)                                                                                                                      | 10 (1.3)<br><br>Cardiovascular disease<br>(N=610; 1.6) |         | 0.46 (0.12-1.81)   | -                                                                    |
| Drugs likely to cause constipation (e.g. antimuscarinic/anticholinergic drugs, oral iron, opioids, verapamil, aluminium antacids) in patients with chronic constipation (N=13) where non-constipating                                   | 9 (1.1)<br><br>Chronic constipation<br>(N=13; 69.2)    |         | 1.63 (0.42-6.20)   | Cannot establish whether non-constipating alternatives are available |

| Criteria                                                                                                                                                                                                                                                                         | N (%)                                            | 95% CI    | ADR OR<br>(95% CI)  | Omission/Limitations                                                     |
|----------------------------------------------------------------------------------------------------------------------------------------------------------------------------------------------------------------------------------------------------------------------------------|--------------------------------------------------|-----------|---------------------|--------------------------------------------------------------------------|
| alternatives are available (risk of exacerbation of constipation).                                                                                                                                                                                                               |                                                  |           |                     |                                                                          |
| Tricyclic antidepressants with dementia, narrow angle glaucoma, cardiac conduction abnormalities, prostatism, or prior history of urinary retention (risk of worsening these conditions).                                                                                        | 7 (0.9)                                          | 0.4 – 1.8 | 1.58 (0.35-7.21)    | Can only establish presence of glaucoma, not whether it is narrow angle. |
| Vasodilator drugs (e.g. alpha-1 receptor blockers, calcium channel blockers, long-acting nitrates, ACE inhibitors, angiotensin I receptor blockers) with persistent postural hypotension i.e. recurrent drop in systolic blood pressure $\geq 20$ mmHg (risk of syncope, falls). | 5 (0.6)<br><br>Postural hypotension (N=24; 20.8) |           | 4.86 (0.53 – 44.53) | -                                                                        |

Potentially identifiable data where n<5 are not presented.

\*Using Bonferroni corrections for 30 criteria p<0.002
